# Supplementary material for: Effect of excited state self-quenching on singlet oxygen photogeneration using nanosheet surface assembled zinc phthalocyanine
Source: Royal Society of Chemistry journal article supplement (doi:10.1039/d4cp04126g), 2025-01-01
Supplement: d4cp04126g1.pdf [file d4cp04126g1.pdf]

**Effect of excited state self-quenching on singlet oxygen  
photogeneration using nanosheet surface assembled zinc  
phthalocyanine**

Takuya Fujimura<sup>\*a</sup>, Kazuya Okada<sup>a</sup>, Masatoshi Nishiguchi<sup>a</sup>, Yasuyuki Araki<sup>b</sup>, Takahisa

Ikeue<sup>a</sup>, Ryo Sasai<sup>\*a,c</sup>

<sup>a</sup> Department of Materials Chemistry, Graduate School of Natural Science and  
Technology, Shimane University, 1060 Nishi-kawatsu-cho, Matsue, 690-8504, Japan

<sup>b</sup> Institute of Multidisciplinary Research for Advanced Materials, Tohoku University,  
Katahira 2-1-1, Aoba-ku, Sendai 980-8577, Japan

<sup>c</sup> Faculty of Materials for Energy, Shimane University, 1060 Nishi-kawatsu-cho,  
Matsue, 690-8504, Japan

## Contents

Synthesis of 3-(4-methylpyridin-2-yloxy)phthalonitrile

Synthesis of 1,8,15,22-tetrakis-[(4-methyl-3-pyridyloxy)phthalocyaninato] zinc(II)

Synthesis of 1,8,15,22-tetrakis-[*N*-methyl-(4-methylpyridinium-3yloxy)phthalocyaninato] zinc(II) iodide

**Figure S1.** UV-Vis absorption spectra of  $\text{ZnPc}^{4+}$  in PBS (black:  $5.7 \times 10^{-7}$  M, gray:  $9.5 \times 10^{-7}$  M, red:  $1.3 \times 10^{-6}$  M, blue:  $1.9 \times 10^{-6}$  M, orange:  $2.9 \times 10^{-6}$  M, green:  $3.8 \times 10^{-6}$  M), inset is Lambert-Beer plot of  $\text{ZnPc}^{4+}$  in PBS (open circle: 641 nm, closed circle: 683 nm).

**Figure S2.** Transient absorption decay profile of  $\text{ZnPc}/\text{SAP}$ , fitting and residual error (loading level of  $\text{ZnPc}^{4+}$  is 1.1% versus CEC).

**Figure S3.** Transient absorption decay profile of  $\text{ZnPc}/\text{SAP}$ , fitting and residual error (loading level of  $\text{ZnPc}^{4+}$  is 5.3% versus CEC).

**Figure S4.** Transient absorption decay profile of  $\text{ZnPc}/\text{SAP}$ , fitting and residual error (loading level of  $\text{ZnPc}^{4+}$  is 12% versus CEC).

**Figure S5.** Transient absorption decay profile of  $\text{ZnPc}/\text{SAP}$ , fitting and residual error (loading level of  $\text{ZnPc}^{4+}$  is 20% versus CEC).

**Figure S6.** Transient absorption decay profile of  $\text{ZnPc}^{4+}/\text{SAP}$ , fitting and residual error (loading level of  $\text{ZnPc}^{4+}$  is 32% versus CEC).

**Figure S7.** Transient absorption decay profile of  $\text{ZnPc}^{4+}/\text{SAP}$ , fitting and residual error (loading level of  $\text{ZnPc}^{4+}$  is 49% versus CEC).

**Figure S8.** Normalized transient absorption decay profile of  $\text{ZnPc}^{4+}/\text{Sap}$  (3.2% vs.

CEC) (red : under N<sub>2</sub>, blue : under air (in the presence of <sup>3</sup>O<sub>2</sub>)).

**Figure S9.** Normalized transient absorption decay profile of ZnPc<sup>4+</sup>/Sap (49% vs. CEC) (red : under N<sub>2</sub>, blue : under air (in the presence of <sup>3</sup>O<sub>2</sub>)).

**Figure S10.** Fluorescence spectra of ZnPc<sup>4+</sup>/SAP dispersion (loading level was varied from 0.086, 0.14, 0.29, 0.57, 1.4, 2.9, 5.7, 17, 29, 40, 51% versus CEC).

### Synthesis of 3-(4-methylpyridin-2-yloxy)phthalonitrile

3-nitrophthalonitrile (0.82 g, 4.74 mmol) and 5-hydroxy-2-methylpyridine (1.02 g, 9.35 mmol) were dissolved in 10 mL of dry *N,N*-dimethylformamide at 50 °C under N<sub>2</sub>.

Potassium carbonate (2.11 g, 15.3 mmol) was added to the reaction solution in 5 portions every 5 min. The reaction mixture was heated for 48 h at 50 °C, then cooled to room temperature, and poured into 100 mL of ice–water. The crude product was extracted for the reaction liquid using 50 mL of CHCl<sub>3</sub> at 3 times. The crude product was redeposited using Diethyl ether. The precipitate was obtained as a pink powder. Yield, 0.47 g (42.2 % (based on 3-nitrophthalonitrile)).

Anal. Calc. for C<sub>14</sub>H<sub>9</sub>N<sub>3</sub>O: C; 70.17, H; 4.12, N; 16.37. Found: C; 69.93, H; 4.21, N; 16.08 %. HR-MS (ESI-TOF): Found 236.0816 *m/z*. [M+nH]<sup>+</sup> (calcd. for C<sub>14</sub>H<sub>9</sub>N<sub>3</sub>O 236.0818). <sup>1</sup>H NMR (CDCl<sub>3</sub>): δ= 8.37(s, 1H, Py-H), 7.59 (t, 1H, *J* = 16.4 Hz, Ar-H), 7.50 (d, 1H, *J* = 7.64 Hz, Ar-H), 7.36 (d, 1H, *J* = 8.41 Hz, Py-H), 7.26 (d, 1H, *J* = 8.41 Hz, Py-H), 7.06 (d, 1H, *J* = 9.00 Hz, Ar-H), and 2.61 ppm (s, 3H, CH<sub>3</sub>).

### Synthesis of 1,8,15,22-tetrakis-[(4-methyl-3-pyridyloxy)phthalocyaninato] zinc(II)

Phthalonitrile (0.41 g, 1.74 mmol) and zinc acetate dihydrate (0.11 g, 0.05 mmol) was induced in *n*-pentanol (10 mL) in the presence of 0.3 mL of 1,8-diazabicyclo[5.4.0]undec-7-ene (DBU) under N<sub>2</sub>. The mixture was heated at 145 °C for 24 h and then cooled to room temperature, and poured into 100 mL of ice–water. The crude product was extracted for the reaction liquid using 50 mL of CHCl<sub>3</sub> at 3 times. The crude product was redeposited using Diethyl ether. The precipitate was obtained as a blue-green solid. Yield, 0.30 g (68.4 % (based on Phthalonitrile **3**)). Anal. Calc. for C<sub>56</sub>H<sub>36</sub>N<sub>12</sub>O<sub>4</sub>Zn + H<sub>2</sub>O: C; 65.66, H; 3.74, N; 16.41.

Found: C; 65.43, H; 4.02, N; 16.24%. UV-vis (CHCl<sub>3</sub>): λ<sub>max</sub>(ε/ mol<sup>-1</sup>dm<sup>3</sup> cm<sup>-1</sup>) = 326 (3.9 × 10<sup>4</sup>), 624 (2.1 × 10<sup>4</sup>), and 693 nm (12.2 × 10<sup>4</sup>).

### Synthesis of 1,8,15,22-tetrakis-[*N*-methyl-(4-methylpyridinium-3-yloxy) phthalocyaninato] zinc(II) iodide

Zinc phthalocyanine (0.10 g, 0.10 mmol) and 5.0 mL of CH<sub>3</sub>I were stirred at 50 °C under N<sub>2</sub>. After 1 day, CH<sub>3</sub>I was removed under reduced pressure. The crude product was washed with acetone and CHCl<sub>3</sub> to obtain the cationic compound as a green solid. Yield, 0.13 g (83.1 % (based on Zinc phthalocyanine)). Anal. Calcd. for

$\text{C}_{60}\text{H}_{48}\text{I}_4\text{N}_{12}\text{O}_4\text{Zn} + \text{CHCl}_3$ : C; 43.26, H; 2.92, N; 9.93. Found: C; 43.42, H; 3.06, N; 9.71 %. UV-vis(DMSO):  $\lambda_{\text{max}}(\epsilon/\text{mol}^{-1}\text{dm}^3\text{ cm}^{-1}) = 382 (1.8 \times 10^4)$ , 620 ( $1.4 \times 10^4$ ), and 689 nm ( $8.5 \times 10^4$ ).

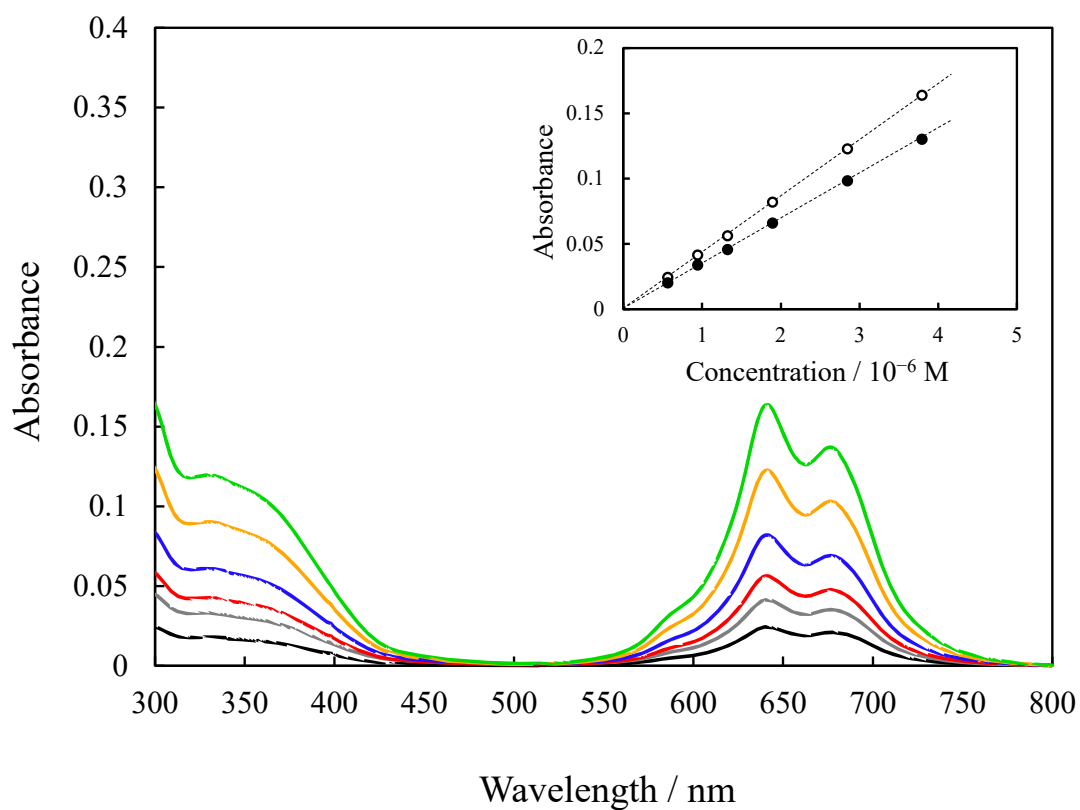

**Figure S1.** UV-Vis absorption spectra of ZnPc<sup>4+</sup> in PBS (black:  $5.7 \times 10^{-7}$  M, gray:  $9.5 \times 10^{-7}$  M, red:  $1.3 \times 10^{-6}$  M, blue:  $1.9 \times 10^{-6}$  M, orange:  $2.9 \times 10^{-6}$  M, green:  $3.8 \times 10^{-6}$  M), inset is Lambert-Beer plot of ZnPc in PBS (open circle: 641 nm, closed circle: 683 nm).

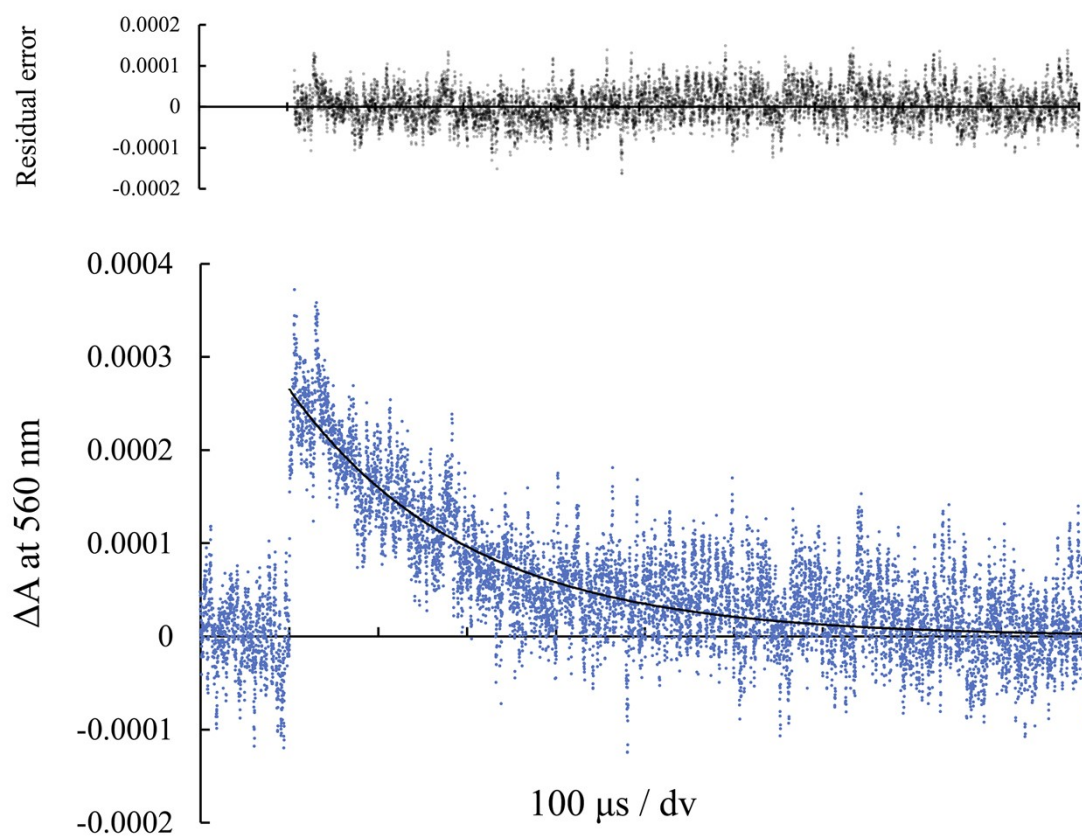

**Figure S2.** Transient absorption decay profile of  $\text{ZnPc}^{4+}/\text{SAP}$ , fitting and residual error (loading level of  $\text{ZnPc}^{4+}$  is 1.1% versus CEC).

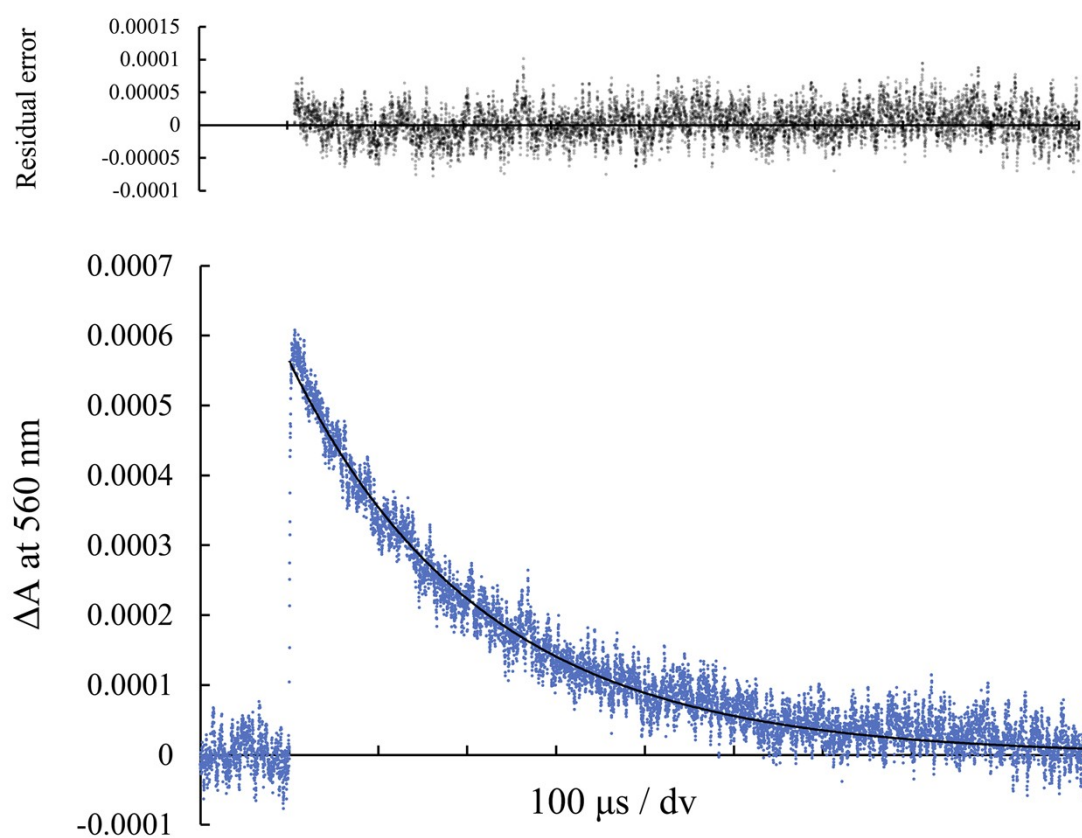

**Figure S3.** Transient absorption decay profile of  $\text{ZnPc}^{4+}/\text{SAP}$ , fitting and residual error (loading level of  $\text{ZnPc}^{4+}$  is 5.3% versus CEC).

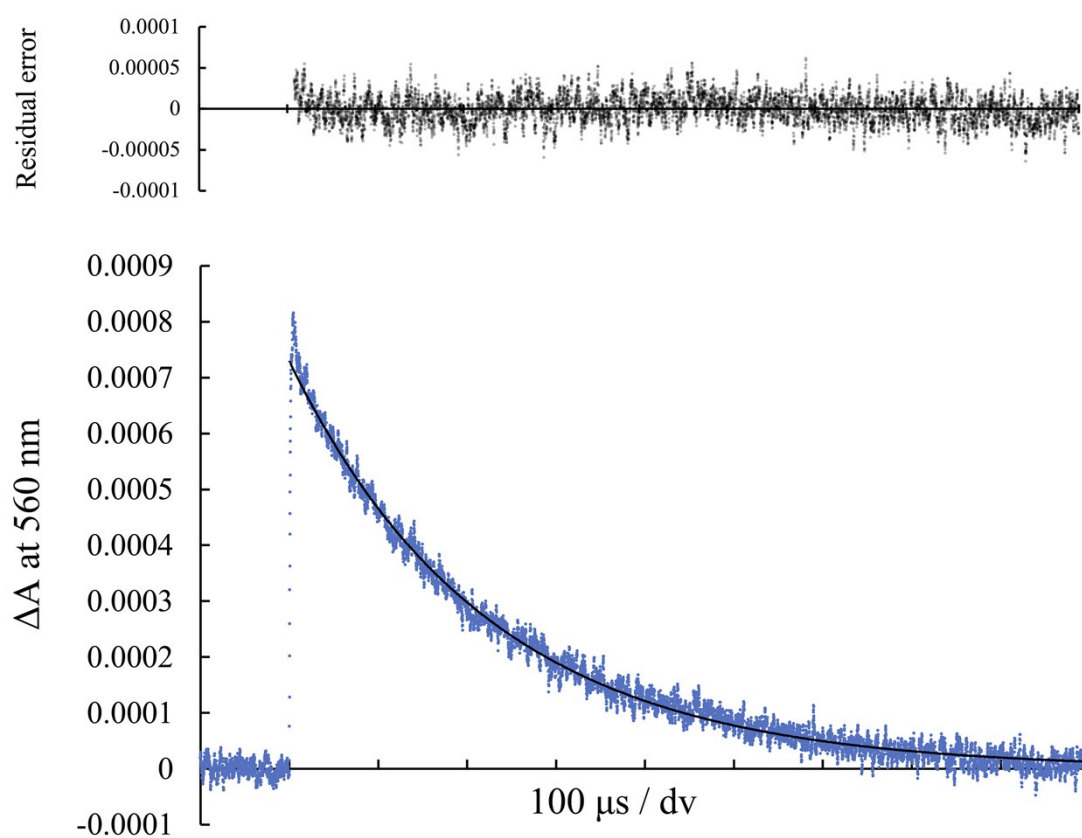

**Figure S4.** Transient absorption decay profile of  $\text{ZnPc}^{4+}/\text{SAP}$ , fitting and residual error (loading level of  $\text{ZnPc}^{4+}$  is 12% versus CEC).

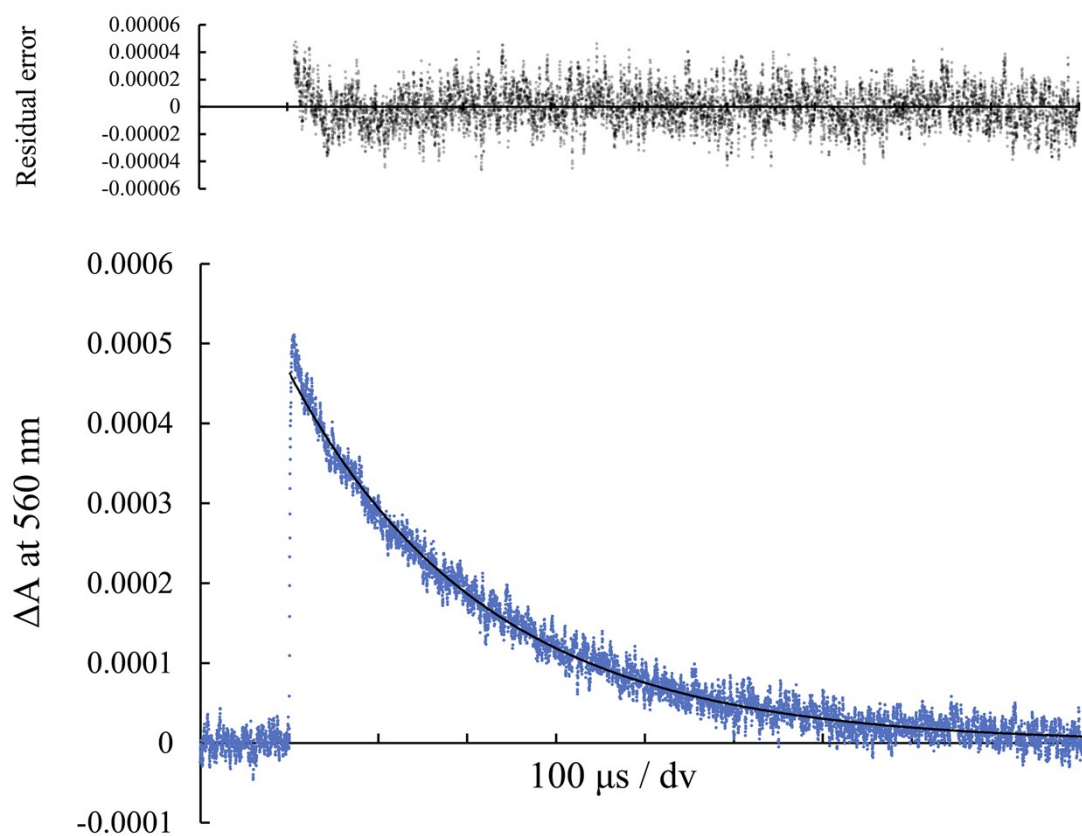

**Figure S5.** Transient absorption decay profile of  $\text{ZnPc}^{4+}/\text{SAP}$ , fitting and residual error (loading level of  $\text{ZnPc}^{4+}$  is 20% versus CEC).

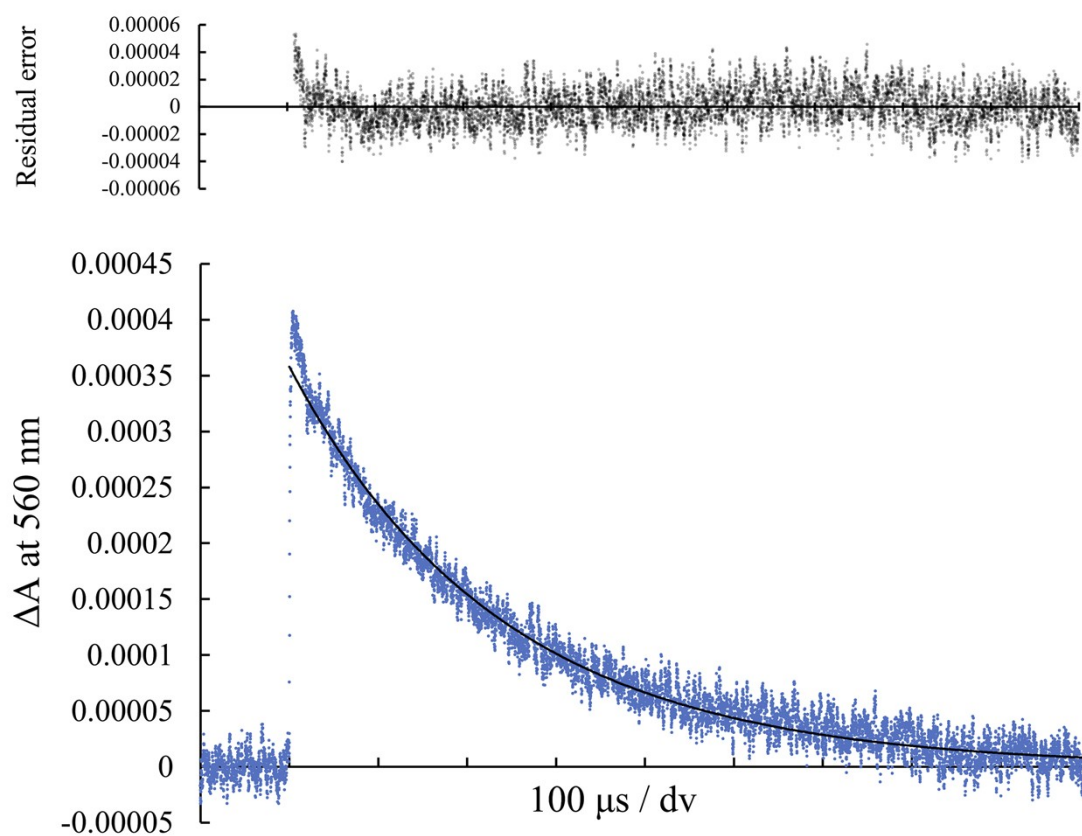

**Figure S6.** Transient absorption decay profile of  $\text{ZnPc}^{4+}/\text{SAP}$ , fitting and residual error (loading level of  $\text{ZnPc}^{4+}$  is 32% versus CEC).

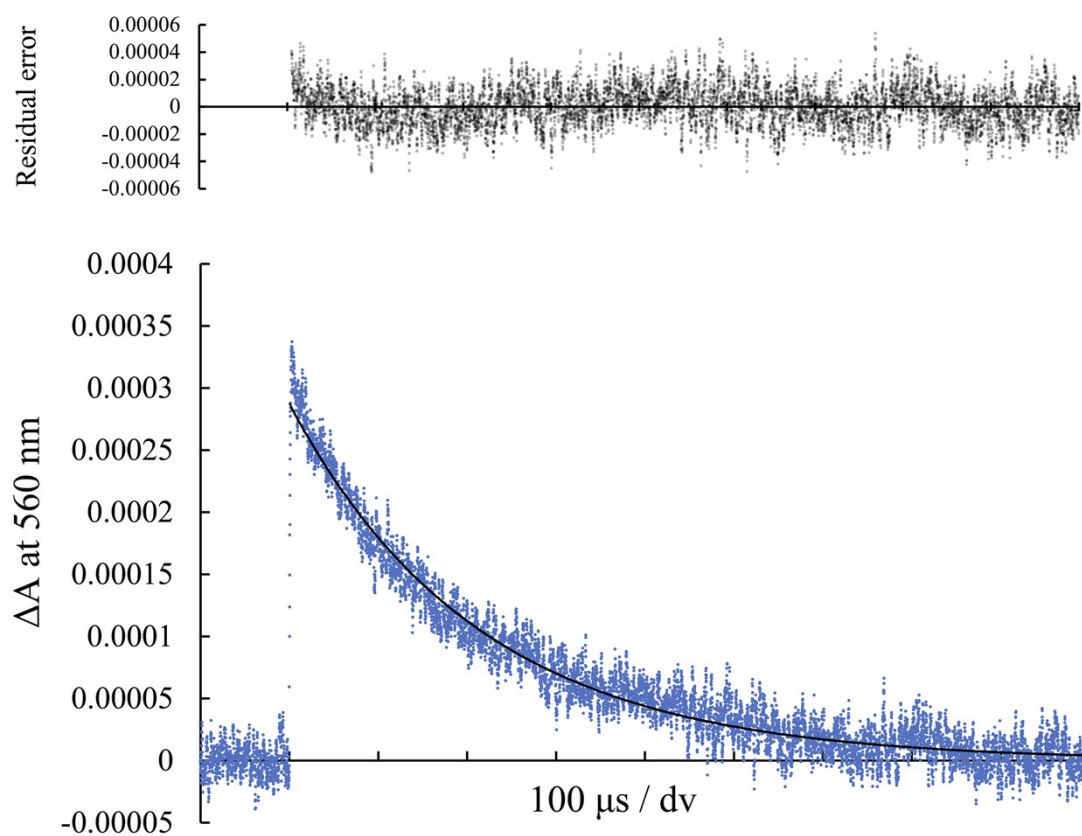

**Figure S7.** Transient absorption decay profile of  $\text{ZnPc}^{4+}/\text{SAP}$ , fitting and residual error (loading level of  $\text{ZnPc}^{4+}$  is 49% versus CEC).

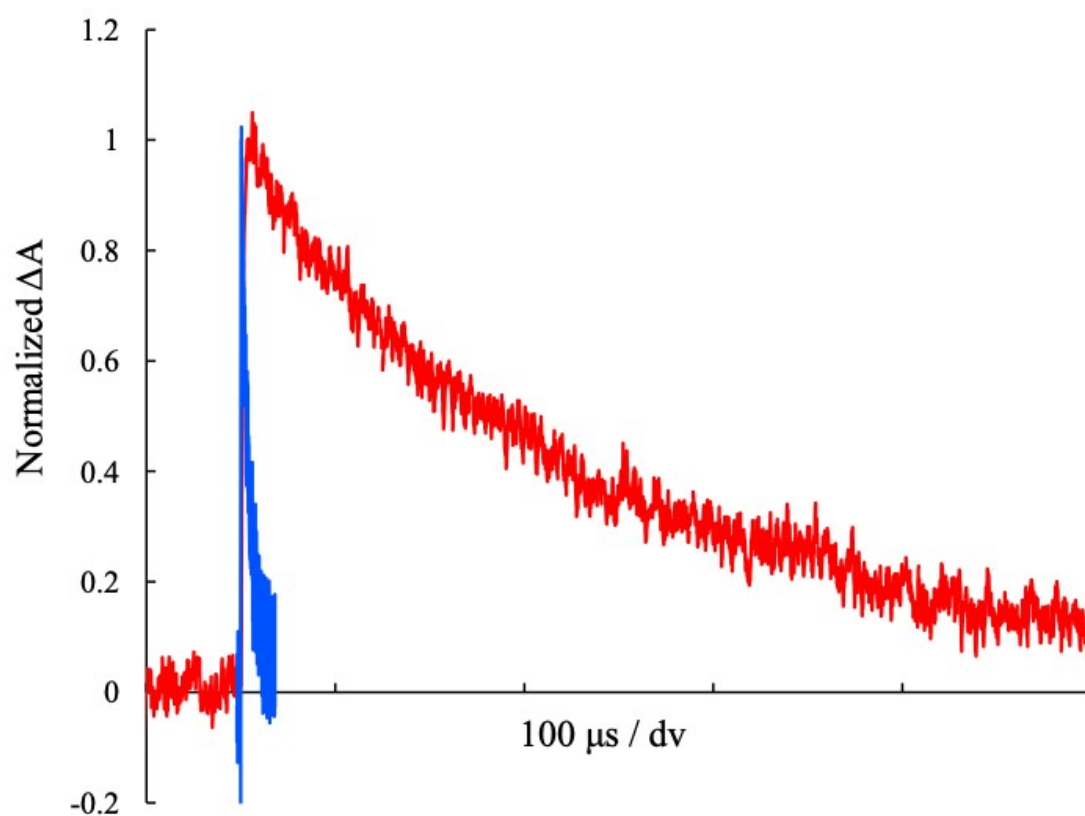

**Figure S8.** Normalized transient absorption decay profile of ZnPc<sup>4+</sup>/Sap (3.2% vs. CEC) (red : under N<sub>2</sub>, blue : under air (in the presence of <sup>3</sup>O<sub>2</sub>)).

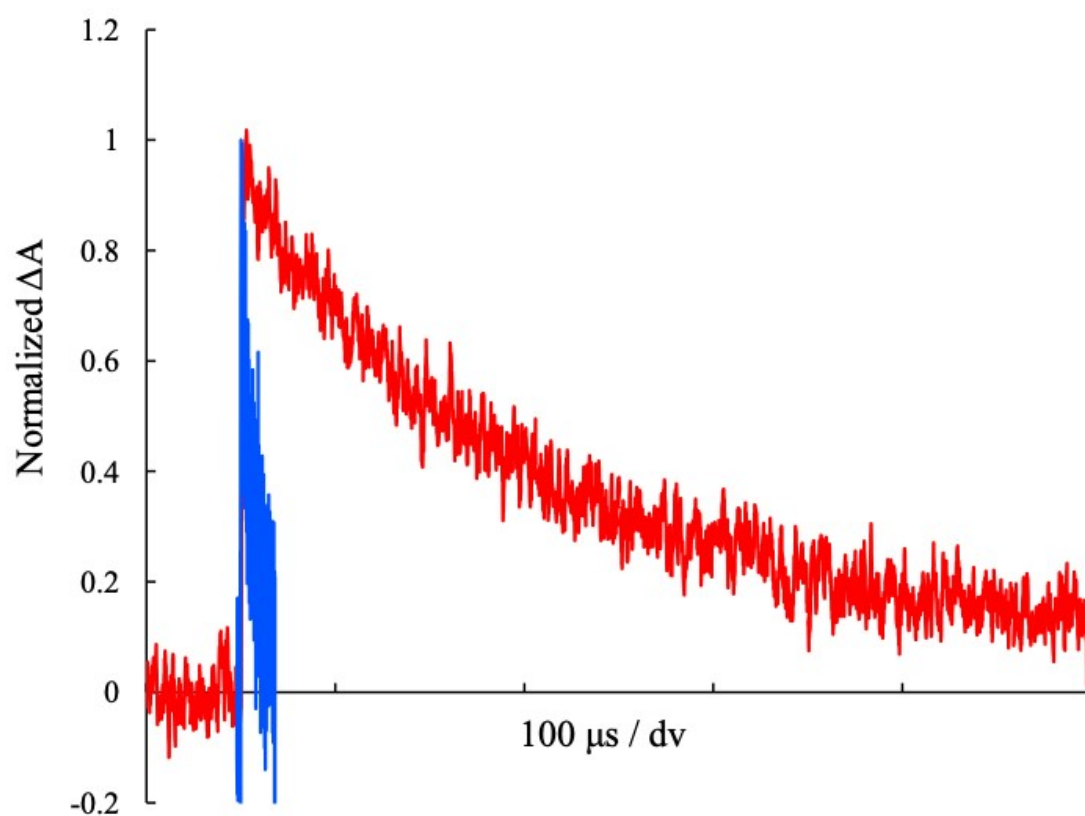

**Figure S9.** Normalized transient absorption decay profile of ZnPc<sup>4+</sup>/Sap (49% vs. CEC) (red : under N<sub>2</sub>, blue : under air (in the presence of <sup>3</sup>O<sub>2</sub>)).

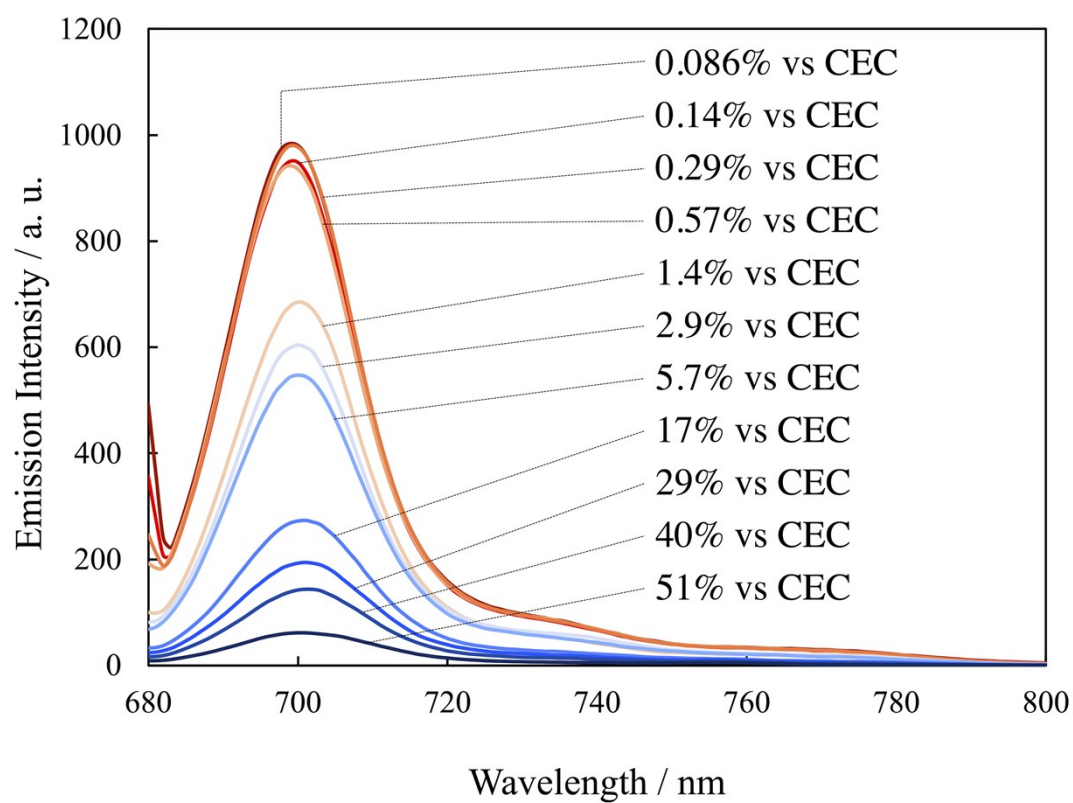

**Figure S10.** Fluorescence spectra of ZnPc<sup>4+</sup>/SAP dispersion (loading level was varied from 0.086, 0.14, 0.29, 0.57, 1.4, 2.9, 5.7, 17, 29, 40, 51% versus CEC).
